# Supplementary material for: Selective Pupil Size Response Within direct and random exploration and exploitation Behaviors
Source: Research Square preprint supplement (doi:10.21203/rs.3.rs-7740172/v1), 2025-10-24
Supplement: Supplementary file 1 [file 83ec5b784df0e33b30df3978.docx]

**supplementary materials**

1. **behavioral model**

Supplementary Table A. Logistic mixed-effects regression model predicting choice behavior on the first free-choice trial.
The analysis revealed significant effects of value gap, planned horizon, and information gap. Participants were more likely to exploit when value differences were larger and in short-horizon conditions, while they engaged in directed exploration when prior sampling was imbalanced.

**Logistic Mixed Model Analysis Results for First Free choice Trial**

| Predictor | Coefficient  β | Std. Error | t | Sig | 95% Lower confidence interval | 95% Upper confidence interval | Exp (Coefficient) | 95% Lower confidence interval for Exp (β) | 95% Upper confidence interval for Exp (β ) | F (1,5279) |
| --- | --- | --- | --- | --- | --- | --- | --- | --- | --- | --- |
| Intercept | 0.437 | 0.1760 | 2.482 | 0.013 | 0.092 | 0.782 | 1.548 | 1.096 | 2.186 |  |
| Value Gap | 0.019 | 0.0034 | 5.521 | <0.001 | 0.012 | 0.026 | 1.019 | 1.012 | 1.026 | 30.479 (1,5279) |
| Planned Horizon | 0.167 | 0.0623 | 2.681 | 0.007 | 0.045 | 0.289 | 1.182 | 1.046 | 1.335 | 7.19 |
| Information Gap | -0.058 | 0.0223 | -2.620 | 0.009 | -0.102 | -0.015 | 0.943 | 0.903 | 0.985 | 6.83 |

1. **Average pupil size analysis**

The table reports fixed coefficients from the linear mixed model predicting average pupil size. A marginal negative effect of Value Gap was observed, whereas Information Gap did not yield a reliable effect. Planned Horizon showed a significant positive effect, with larger pupil size in the short horizon condition relative to the long horizon baseline.

| **Model Term** | **Coefficient** | **Std. Error** | **t** | **Sig.** | **95% CI Lower** | **95% CI Upper** |
| --- | --- | --- | --- | --- | --- | --- |
| Intercept | 4122.574 | 236.8283 | 17.407 | 0 | 3658.291 | 4586.857 |
| Value Gap | -0.968 | 0.5445 | -1.777 | 0.076 | -2.035 | 0.1 |
| Information gap Equal=1 | -3.89 | 10.0731 | -0.386 | 0.699 | -23.638 | 15.857 |
| Equal=2 |  |  |  |  |  |  |
| Planned horizon =1 | 21.871 | 10.0721 | 2.171 | 0.03 | 2.126 | 41.617 |
| Planned horizon =6 |  |  |  |  |  |  |

1. **Bin Analysis- Trial by trial pupil size**

Linear mixed-effects model analyses for pupil size across the decision window revealed a consistent negative association with value gap, such that larger differences between options were accompanied by smaller pupil diameter. This effect was weak and stable rather than phasic. Bin-wise analyses confirmed this pattern, with negative coefficients for value gap across bins, significant effects of planning horizon at early (Bin –6) and late (Bin –1) pre-choice intervals, and a marginal effect at choice onset (Bin 0). No significant effects were observed for information gap in any bin. Overall, these findings indicate that decision variables modulated pupil-linked arousal in gradual and sustained ways, without evidence for transient peaks.

| **Fixed Coefficients (bin 0= choice)** | | | | | | |
| --- | --- | --- | --- | --- | --- | --- |
| Model Term | **Coefficient** | **Std. Error** | **t** | **Sig.** | **95% Confidence Interval** | |
| **Lower** | **Upper** |
| Intercept | 4117.926 | 996.0669 | 4.134 | 0.000 | 2165.174 | 6070.679 |
| Value Gap | -1.140 | 0.5761 | -1.978 | 0.048 | -2.269 | -0.010 |
| Planned Horizon=1 | 18.253 | 10.6867 | 1.708 | 0.088 | -2.698 | 39.204 |
| Planned Horizon=6 | 0b |  |  |  |  |  |
| Information gap Equal=1 | 0.034 | 10.6900 | 0.003 | 0.997 | -20.923 | 20.992 |
| Equal=2 | 0b |  |  |  |  |  |
|  |  |  |  |  |  |  |
|  |  |  |  |  |  |  |
| **Fixed Coefficients (bin- 1)** | | | | | | |
| Model Term | Coefficient | Std. Error | t | Sig. | 95% Confidence Interval | |
| Lower | Upper |
| Intercept | 4116.585 | 995.8497 | 4.134 | 0.000 | 2164.266 | 6068.905 |
| Value Gap | -1.014 | 0.5700 | -1.778 | 0.075 | -2.131 | 0.104 |
| Information gap Equal=1 | -0.927 | 10.5843 | -0.088 | 0.930 | -21.677 | 19.823 |
| Equal=2 | 0b |  |  |  |  |  |
| Planned Horizon=1 | 21.797 | 10.5823 | 2.060 | 0.039 | 1.051 | 42.544 |
| Planned Horizon=6 | 0b |  |  |  |  |  |
|  |  |  |  |  |  |  |
|  | | | | | | |
|  | | | | | | |
|  |  |  |  |  |  |  |
|  |  |  |  |  |  |  |
|  |  |  |  |  |  |  |
| **Fixed Coefficients (bin -2)** | | | | | | |
| **Model Term** | **Coefficient** | **Std. Error** | **t** | **Sig.** | **95%  Confidence Interval** | |
| **Lower** | **Upper** |
| Intercept | 4130.457 | 995.1803 | 4.150 | 0.000 | 2179.340 | 6081.574 |
| Value Gap | -1.014 | 0.5700 | -1.778 | 0.075 | -2.131 | 0.104 |
| Planned Horizon=1 | 14.303 | 11.6376 | 1.229 | 0.219 | -8.514 | 37.119 |
| Planned Horizon=6 | 0b |  |  |  |  |  |
| Information gap Equal=1 | -4.040 | 11.6401 | -0.347 | 0.729 | -26.861 | 18.781 |
| Equal=2 | 0b |  |  |  |  |  |
|  | | | | | | |
|  | | | | | | |
|  |  |  |  |  |  |  |
| **Fixed Coefficients (bin -3)** | | | | | | |
| **Model Term** | **Coefficient** | **Std. Error** | **t** | **Sig.** | **95%**  **Confidence Interval** | |
| **Lower** | **Upper** |
| Intercept | 4131.510 | 990.5385 | 4.171 | 0.000 | 2189.332 | 6073.688 |
| Value Gap | -1.280 | 0.6910 | -1.852 | 0.064 | -2.635 | 0.075 |
| Information gap Equal=1 | -1.785 | 12.8462 | -0.139 | 0.889 | -26.973 | 23.402 |
| Equal=2 | 0b |  |  |  |  |  |
| Planned Horizon=1 | 7.069 | 12.8367 | 0.551 | 0.582 | -18.100 | 32.238 |
| Planned Horizon=6 | 0b |  |  |  |  |  |
|  |  |  |  |  |  |  |
| **Fixed Coefficients (bin -4)** | | | | | | |
| **Model Term** | **Coefficient** | **Std. Error** | **t** | **Sig.** | **95% Confidence Interval** | |
| **Lower** | **Upper** |
| Intercept | 4119.764 | 962.3234 | 4.281 | 0.000 | 2232.678 | 6006.849 |
| Value Gap | -0.575 | 0.7824 | -0.735 | 0.462 | -2.109 | 0.959 |
| Planned Horizon=1 | 12.400 | 14.4653 | 0.857 | 0.391 | -15.966 | 40.766 |
| Planned Horizon=6 | 0b |  |  |  |  |  |
| Information gap Equal=1 | 2.096 | 14.5045 | 0.145 | 0.885 | -26.346 | 30.539 |
| Equal=2 | 0b |  |  |  |  |  |
|  |  |  |  |  |  |  |
|  |  |  |  |  |  |  |
| **Fixed Coefficients (bin -5 )** | | | | | | |
| **Model Term** | **Coefficient** | **Std. Error** | **t** | **Sig.** | **95% Confidence Interval** | |
| **Lower** | **Upper** |
| Intercept | 4139.697 | 958.4222 | 4.319 | 0.000 | 2259.824 | 6019.569 |
| Value Gap | -1.349 | 0.9370 | -1.440 | 0.150 | -3.187 | 0.489 |
| Horizon=1 | 18.842 | 17.3286 | 1.087 | 0.277 | -15.147 | 52.831 |
| Horizon=6 | 0b |  |  |  |  |  |
| Information gap Equal=1 | -4.132 | 17.3289 | -0.238 | 0.812 | -38.121 | 29.857 |
| Equal=2 | 0b |  |  |  |  |  |
|  |  |  |  |  |  |  |
| **Fixed Coefficients (bin -6 )** | | | | | | |
| **Model Term** | **Coefficient** | **Std. Error** | **t** | **Sig.** | **95% Confidence Interval** | |
| **Lower** | **Upper** |
| Intercept | 4126.272 | 906.5165 | 4.552 | 0.000 | 2347.591 | 5904.953 |
| Value Gap | -1.349 | 0.9370 | -1.440 | 0.150 | -3.187 | 0.489 |
| Information gap Equal=1 | -11.700 | 21.2352 | -0.551 | 0.582 | -53.366 | 29.965 |
| Equal=2 | 0b |  |  |  |  |  |
| Horizon=1 | 51.323 | 21.2758 | 2.412 | 0.016 | 9.578 | 93.069 |
| Horizon=6 | 0b |  |  |  |  |  |
